# Supplementary material for: Eco-Friendly Binder and Thickening Agent Isolated From Apple Rock Bael for Valuable Utilization in Textile Printing
Source: Research Square preprint supplement (doi:10.21203/rs.3.rs-4850671/v1), 2024-08-23
Supplement: Supplementary file 1 [file b311a6c4722558b5f59fcb17.docx]

Table 1. Formulation of the printing paste

| Components | Weight/gm |
| --- | --- |
| pigment | 20 |
| Thickener | 80 |
| Urea | 10 |
| Water | X |
| Sodium dihydrogen phosphate | 10 |
| Total | 1,000 g |

Table 2: Effect of isolated gum concentration on the apparent viscosity of the printing paste

| Gum conc. % | 1 | 2 | 3 | 4 |
| --- | --- | --- | --- | --- |
| RS cm-1 | Apparent Viscosity in centipoise | | | |
| 3.4 | 4640 | 5464 | 840 | 590 |
| 6.8 | 3640 | 3980 | 770 | 590 |
| 10.2 | 2440 | 1816 | 582 | 370 |
| 13.6 | 1473 | 1440 | 420 | 328 |
| 17 | 1135 | 1484 | 290 | 290 |
| 20.4 | 1032 | 1400 | 269 | 260 |
| 23.8 | 771 | 1264 | 251 | 203 |
| 27.2 | 757 | 946 | 196 | 202 |
| 30.6 | 740 | 540 | 179 | 160 |
| 34 | 300 | 490 | 165 | 148 |

Table 3: Effect of printing bath pH on the apparent viscosity of printing paste prepared by using isolated gum from apple rock.

| Printing paste pH | 4 | 7 | 9 |
| --- | --- | --- | --- |
| RS cm-1 | Apparent Viscosity in centipoise | | |
| 3.4 | 1544 | 800 | 770 |
| 6.8 | 1530 | 730 | 728 |
| 10.2 | 1504 | 542 | 533 |
| 13.6 | 1482 | 380 | 332 |
| 17 | 1475 | 250 | 227 |
| 20.4 | 1428 | 229 | 225 |
| 23.8 | 1387 | 211 | 208 |
| 27.2 | 1381 | 156 | 146 |
| 30.6 | 1345 | 139 | 131 |
| 34 | 1225 | 125 | 111 |

Table 4: Color strength (K/S) and fastness properties of different printed fabrics using the isolated gum as a thickener, binder, or simultaneous (both in one)

| Fabric | Gum used | K/S | Fastness | | | | | | | | |
| --- | --- | --- | --- | --- | --- | --- | --- | --- | --- | --- | --- |
| Washing | | Perspiration | | | | Rubbing | | Light |
| Acidic | | Alkaline | |
| Alt. | St | Alt | St | Alt | St | Dry | Wet |
| Cotton | Thickener | 9.92 | 3-4 | 3-4 | 3-4 | 3-4 | 4-5 | 4-5 | 3-4 | 3-4 | 6-7 |
| Binder | 7.73 | 3 | 3 | 3-4 | 3 | 3-4 | 4 | 3-4 | 3-4 | 6 |
| Both | 1.21 | 2 | 3 | 2-3 | 2 | 2 | 2-3 | 2 | 2 | 3-4 |
| Wool | Thickener | 13.39 | 3-4 | 3-4 | 4 | 4 | 4-5 | 4-5 | 4 | 4 | 6-7 |
| Binder | 10.76 | 3 | 3 | 3-4 | 3-4 | 3-4 | 4 | 3-4 | 3-4 | 6 |
| Both | 3.03 | 2 | 3 | 2-3 | 2 | 2 | 2-3 | 2 | 2 | 4 |
| Silk | Thickener | 12.87 | 3-4 | 4 | 4 | 4 | 4 | 4 | 4 | 4 | 6-7 |
| Binder | 9.75 | 3 | 3 | 3-4 | 3-4 | 4 | 4-5 | 3-4 | 3-4 | 6 |
| Both | 2.14 | 2 | 3 | 2-3 | 2 | 2 | 2-3 | 2 | 2 | 4 |
| Polyester/  Cotton | Thickener | 12.51 | 4 | 4 | 4 | 4 | 4 | 4 | 4 | 4 | 6-7 |
| Binder | 8.91 | 3-4 | 3-4 | 4 | 4 | 4 | 4-5 | 3-4 | 3-4 | 6 |
| Both | 1.93 | 2 | 3 | 2-3 | 2 | 2 | 2-3 | 2 | 2 | 3-4 |

Table 5: Effect of microwave fixation on printing of different fabric for different times and Watt (covered (1), and uncovered (2))

|  | Color strength (K/S) | | | | | | | | | | | |
| --- | --- | --- | --- | --- | --- | --- | --- | --- | --- | --- | --- | --- |
| Fabric | | Microwave irradiation/Watt | | | | | | | | | | |  | As thickener | As binder | simultaneous |
|  |  | Fixation time/sec. | | | | | | | | |
|  | 15 | 30 | 60 | 15 | 30 | 60 | 15 | 30 | 60 |
| Cotton | | 50 | 1 | 11.14 | 13.38 | 15.27 | 9.09 | 9.87 | 10.10 | 2.00 | 2.48 | 2.81 |
| 2 | 9.91 | 10.75 | 13.35 | 7.31 | 7.97 | 9.09 | 1.71 | 2.11 | 2.40 |
| 70 | 1 | 13.72 | 15.98 | 18.88 | 10.24 | 11.09 | 11.98 | 2.52 | 2.84 | 3.03 |
| 2 | 11.84 | 13.53 | 16.64 | 9.81 | 10.54 | 11.01 | 2.13 | 2.58 | 2.81 |
| 90 | 1 | 12.08 | 15.14 | 17.36 | 8.76 | 9.71 | 10.09 | 2.01 | 2.41 | 2.53 |
| 2 | 10.63 | 12.71 | 15.99 | 7.73 | 9.01 | 9.15 | 1.86 | 2.20 | 2.41 |
| Wool | | 50 | 1 | 13.84 | 16.69 | 19.83 | 11.01 | 13.63 | 15.09 | 2.21 | 2.54 | 2.71 |
| 2 | 11.08 | 14.53 | 16.96 | 10.71 | 11.25 | 13.41 | 1.91 | 2.26 | 2.29 |
| 70 | 1 | 12.97 | 16.66 | 17.77 | 10.71 | 11.21 | 11.23 | 2.01 | 2.31 | 2.57 |
| 2 | 10.79 | 14.61 | 15.98 | 9.98 | 10.34 | 10.84 | 1.73 | 1.96 | 2.10 |
| 90 | 1 | 10.91 | 16.14 | 17.05 | 9.12 | 9.87 | 10.05 | 2.21 | 2.12 | 1.96 |
| 2 | 10.05 | 14.94 | 15.14 | 8.87 | 9.25 | 9.75 | 1.91 | 1.80 | 1.99 |
| Silk | | 50 | 1 | 12.32 | 15.55 | 17.62 | 10.52 | 11.38 | 13.49 | 2.07 | 2.20 | 2.22 |
| 2 | 11.06 | 13.31 | 14.80 | 9.76 | 10.67 | 11.96 | 1.87 | 1.91 | 1.97 |
| 70 | 1 | 10.94 | 13.01 | 15.93 | 9.91 | 10.08 | 10.09 | 1.92 | 2.50 | 2.55 |
| 2 | 10.11 | 11.30 | 15.08 | 9.40 | 9.75 | 9.78 | 1.10 | 1.89 | 1.97 |
| 90 | 1 | 10.54 | 14.10 | 15.16 | 9.76 | 10.47 | 10.93 | 1.22 | 1.54 | 1.54 |
| 2 | 9.83 | 11.91 | 14.19 | 8.76 | 8.97 | 9.73 | 0.91 | 0.98 | 1.40 |
| Polyester/Cotton | | 50 | 1 | 9.74 | 10.58 | 13.47 | 7.78 | 8.31 | 8.89 | 0.76 | 0.98 | 1.54 |
| 2 | 8.41 | 10.06 | 10.63 | 6.66 | 6.92 | 7.28 | 0.55 | 0.81 | 1.06 |
| 70 | 1 | 11.93 | 15.64 | 18.09 | 9.35 | 9.86 | 10.61 | 0.94 | 1.41 | 1.84 |
| 2 | 10.31 | 15.00 | 17.50 | 7.16 | 8.82 | 8.99 | 0.82 | 1.00 | 1.06 |
| 90 | 1 | 7.75 | 10.81 | 12.96 | 8.41 | 9.23 | 9.99 | 0.71 | 0.90 | 0.90 |
| 2 | 7.07 | 9.96 | 12.70 | 7.07 | 7.98 | 8.08 | 0.51 | 0.85 | 0.81 |

Table 6: Effect of thermo fixation on printing of different fabrics for different times and temperatures

| Color strength (K/S) | | | | | | | | | | |
| --- | --- | --- | --- | --- | --- | --- | --- | --- | --- | --- |
| Fabric | Fixation temp/°C | As thickener | | | As binder | | | simultaneous | | |
| Fixation time/min. | | | | | | | | |
| 2 | 4 | 6 | 2 | 4 | 6 | 2 | 4 | 6 |
| Cotton | 120 | 8.84 | 9.98 | 9.92 | 7.42 | 8.03 | 7.73 | 1.01 | 1.54 | 1.21 |
| 140 | 9.08 | 13.91 | 13.41 | 8.23 | 10.84 | 10.15 | 1.52 | 1.87 | 1.66 |
| 160 | 8.81 | 13.06 | 12.39 | 8.11 | 10.32 | 9.89 | 1.31 | 1.01 | 0.98 |
| Wool | 120 | 12.51 | 12.97 | 13.39 | 9.93 | 10.41 | 10.76 | 2.35 | 2.71 | 3.03 |
| 140 | 12.77 | 13.48 | 13.89 | 9.97 | 10.98 | 11.35 | 2.35 | 2.74 | 3.07 |
| 160 | 13.87 | 14.98 | 16.97 | 11.11 | 12.74 | 14.81 | 2.56 | 2.90 | 3.33 |
| Silk | 120 | 9.61 | 10.92 | 12.87 | 8.07 | 8.81 | 9.75 | 2.02 | 2.13 | 2.14 |
| 140 | 9.93 | 12.87 | 14.36 | 8.14 | 9.31 | 10.96 | 2.32 | 2.57 | 2.71 |
| 160 | 14.33 | 15.62 | 16.09 | 10.00 | 10.92 | 13.31 | 2.33 | 2.70 | 2.90 |
| Polyester/Cotton | 120 | 9.31 | 9.98 | 12.51 | 7.77 | 8.54 | 8.91 | 1.11 | 1.72 | 1.93 |
| 140 | 9.64 | 11.15 | 14.20 | 8.14 | 8.58 | 9.83 | 1.70 | 2.01 | 2.13 |
| 160 | 11.57 | 14.91 | 16.07 | 8.34 | 9.32 | 10.41 | 1.94 | 2.56 | 2.96 |

Table 7: Printing performance of the printed different fabrics and fixed in microwave irradiation (covering samples)

| Isolated gum used | K/S | Penetration% | Unevenness | Stiffness | F% |
| --- | --- | --- | --- | --- | --- |
| Cotton | | | | | |
| Thickener | 18.88 | 73 | 11.7181 | 1731.6 | 83.21 |
| Binder | 11.98 | 60 | 9.35 | 1228.9 | 78.83 |
| Wool | | | | | |
| Thickener | 19.83 | 95 | 15.8326 | 1667.4 | 95.89 |
| Binder | 15.09 | 83 | 11.0437 | 1351.7 | 91.99 |
| Silk | | | | | |
| Thickener | 17.62 | 93 | 14.4031 | 1548.5 | 92.74 |
| Binder | 13.49 | 82 | 11.1110 | 1321.1 | 89.97 |
| Polyester/cotton | | | | | |
| Thickener | 18.09 | 72 | 12.4017 | 1828.1 | 87.3 |
| Binder | 10.61 | 65 | 9.90 | 1447.7 | 82.8 |

Table 8: Color fastness Properties of the printed sample fixed via microwave irradiation and thermo fixation approach.

| Gum used | Fastness properties | | | | | | | | |
| --- | --- | --- | --- | --- | --- | --- | --- | --- | --- |
| Washing | | Rubbing | | Perspiration | | | | Light |
| Acidic | | Alkaline | |
| Alt | St | Dry | Wet | Alt | St | Alt | St |
| Microwave fixation | | | | | | | | | |
| Cotton | | | | | | | | | |
| Thickener | 3-4 | 3-4 | 4 | 3-4 | 3-4 | 3-4 | 4 | 4 | 6 |
| Binder | 3 | 2-3 | 2-3 | 3 | 3 | 3 | 3 | 3 | 4-5 |
| Wool | | | | | | | | | |
| Thickener | 4-5 | 4-5 | 4 | 4 | 4 | 4 | 4 | 4 | 6-7 |
| Binder | 3-4 | 3-4 | 3-4 | 3-4 | 3-4 | 3-4 | 3-4 | 3 | 5-6 |
| Silk | | | | | | | | | |
| Thickener | 4 | 4 | 4 | 3-4 | 3-4 | 3-4 | 4 | 4 | 6 |
| Binder | 3 | 3 | 3-4 | 3-4 | 3 | 3 | 3 | 3-4 | 5-6 |
| Polyester/cotton | | | | | | | | | |
| Thickener | 3-4 | 3-4 | 3-4 | 4 | 4 | 4 | 3-4 | 3-4 | 5-6 |
| Binder | 3 | 3 | 3 | 3 | 3-4 | 4 | 4 | 3 | 5 |
| Thermo fixation | | | | | | | | | |
| Cotton | | | | | | | | | |
| Thickener | 3 | 3 | 3 | 3 | 3 | 3 | 3 | 3 | 6 |
| Binder | 2-3 | 2-3 | 3 | 2-3 | 2-3 | 2-3 | 2-3 | 2-3 | 5-6 |
| Wool | | | | | | | | | |
| Thickener | 3 | 3 | 3-4 | 3-4 | 3-4 | 3-4 | 4 | 4 | 5-6 |
| Binder | 2-3 | 2-3 | 3 | 3 | 3 | 3 | 2-3 | 2-3 | 6 |
| Silk | | | | | | | | | |
| Thickener | 3-4 | 3-4 | 3-4 | 3-4 | 3-4 | 3-4 | 4 | 4 | 5-6 |
| Binder | 3 | 3 | 3 | 3 | 3 | 3 | 3-4 | 3-4 | 5 |
| Polyester/Cotton | | | | | | | | | |
| Thickener | 3-4 | 3-4 | 4 | 4 | 4 | 4 | 4-5 | 3-4 | 6 |
| Binder | 3 | 3 | 3 | 2-3 | 3 | 3 | 3 | 3 | 5 |

Fixation condition: microwave irradiation: 70 watts for cotton and polyester/cotton, while at 50 watts for wool and silk for 60 seconds. Thermo fixation: at 140°C for cotton and at 160°C for other three fabrics for 6 min. for all fabric
